# Supplementary material for: Dissecting Inflammatory Complications in Critically Injured Patients by Within-Patient Gene Expression Changes: A Longitudinal Clinical Genomics Study
Source: PLOS journal article supplement (doi:10.1371/journal.pmed.1001093), 2011-09-13

## Workflow in processing microarrays for main analysis

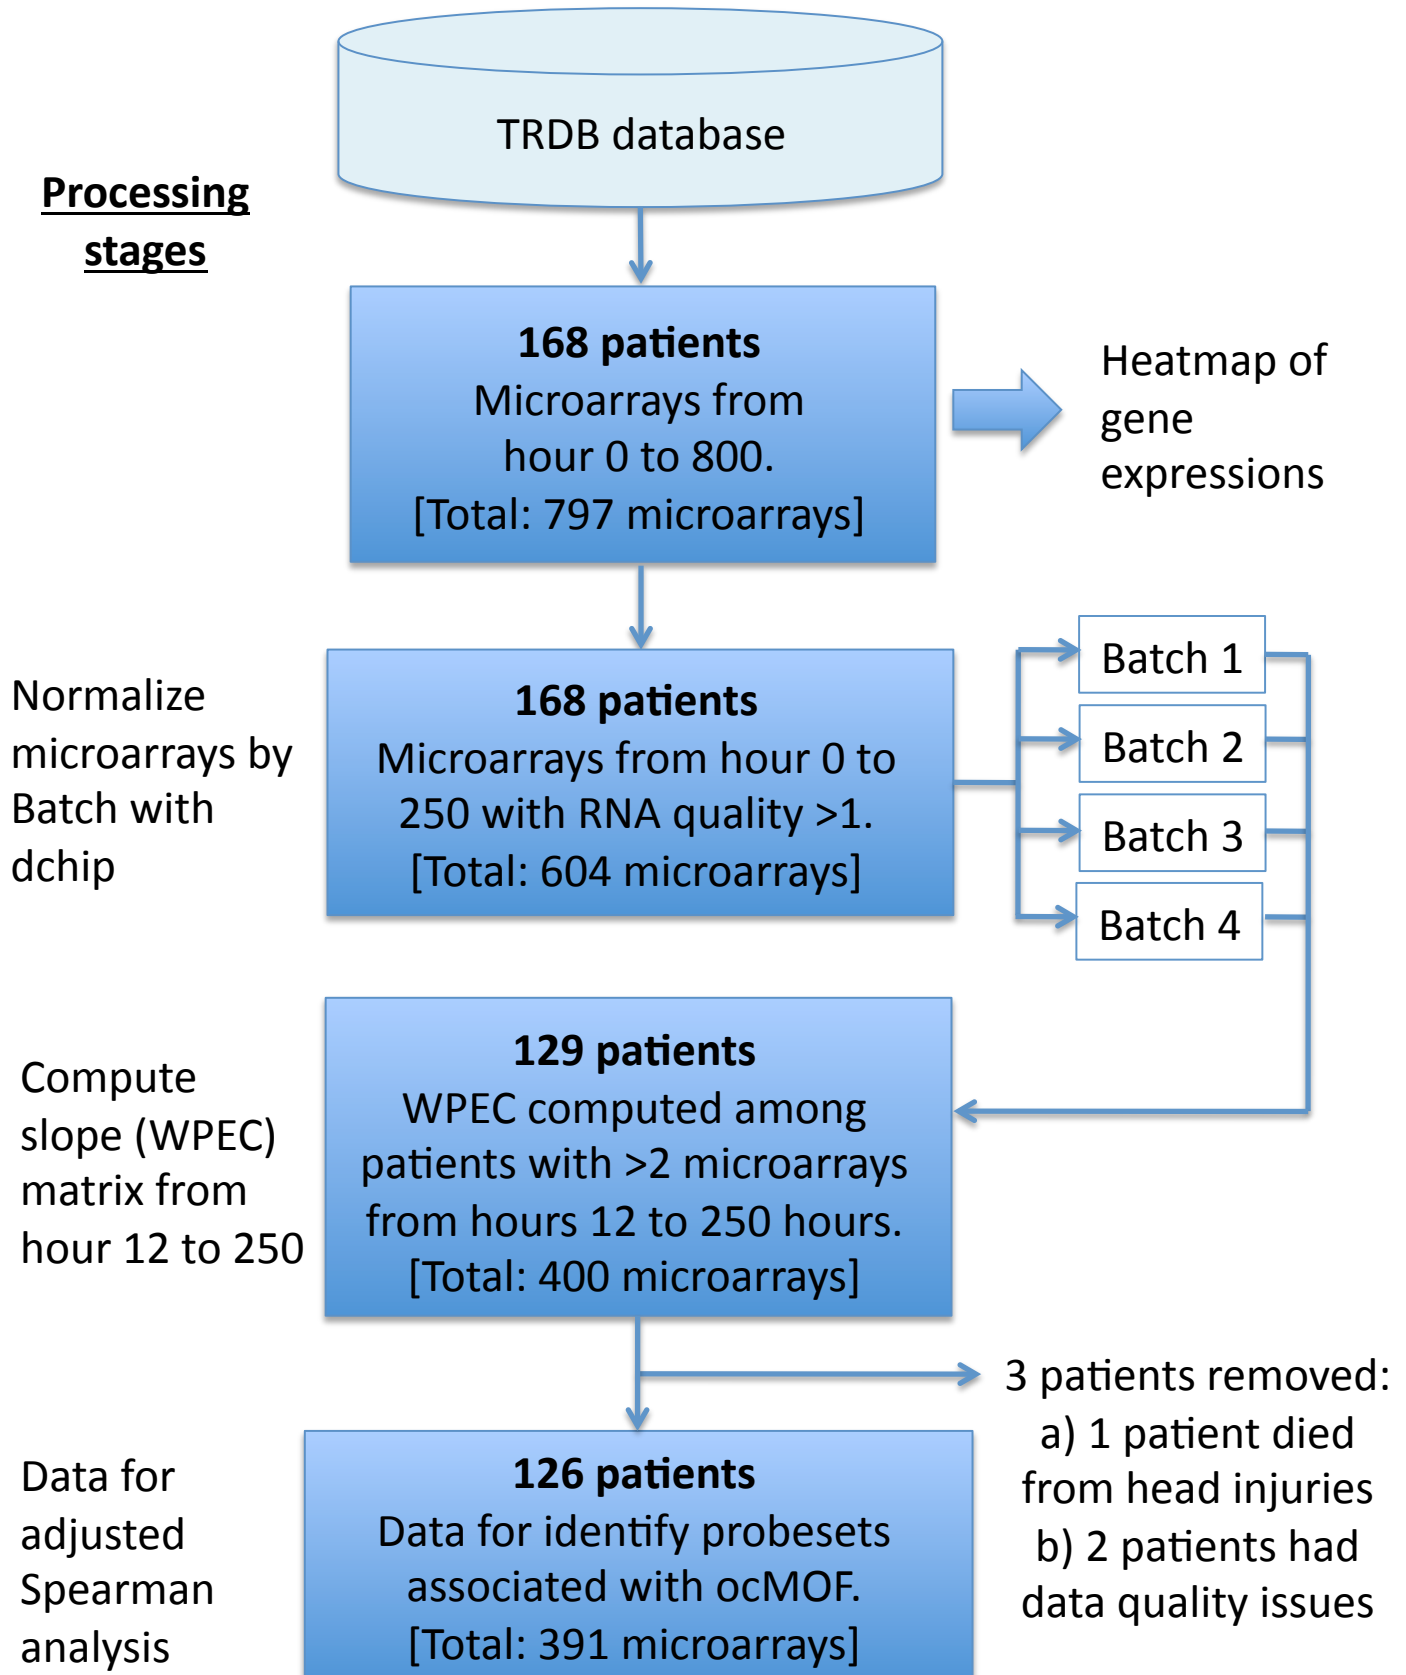

Using 126 patients for cross validation (illustration):  
Reproducibility and Prediction

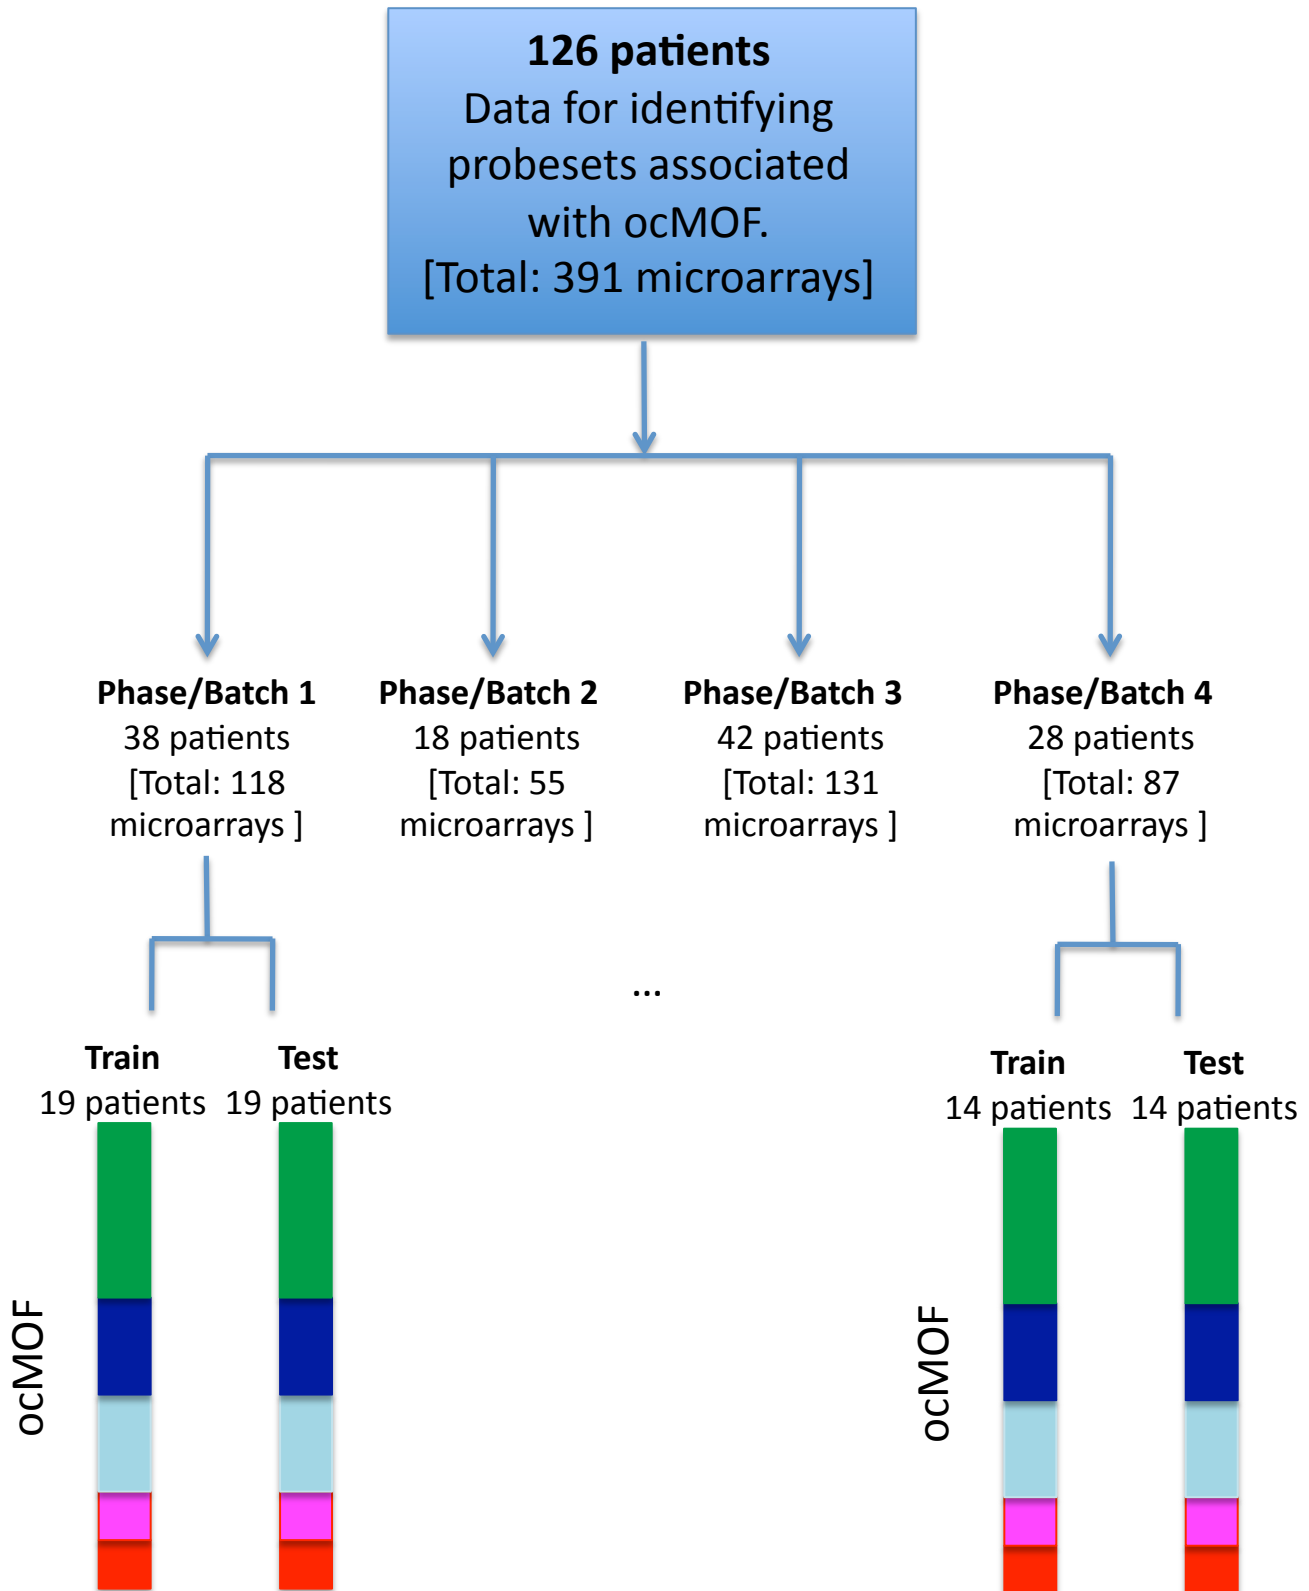

Supplement: S1 (10.1371/journal.pmed.1001093.s001) [file journal.pmed.1001093.s001]
