# Supplementary material for: Dissecting Inflammatory Complications in Critically Injured Patients by Within-Patient Gene Expression Changes: A Longitudinal Clinical Genomics Study
Source: PLOS journal article supplement (doi:10.1371/journal.pmed.1001093), 2011-09-13
Supplement: S3 (10.1371/journal.pmed.1001093.s003) [file journal.pmed.1001093.s003]

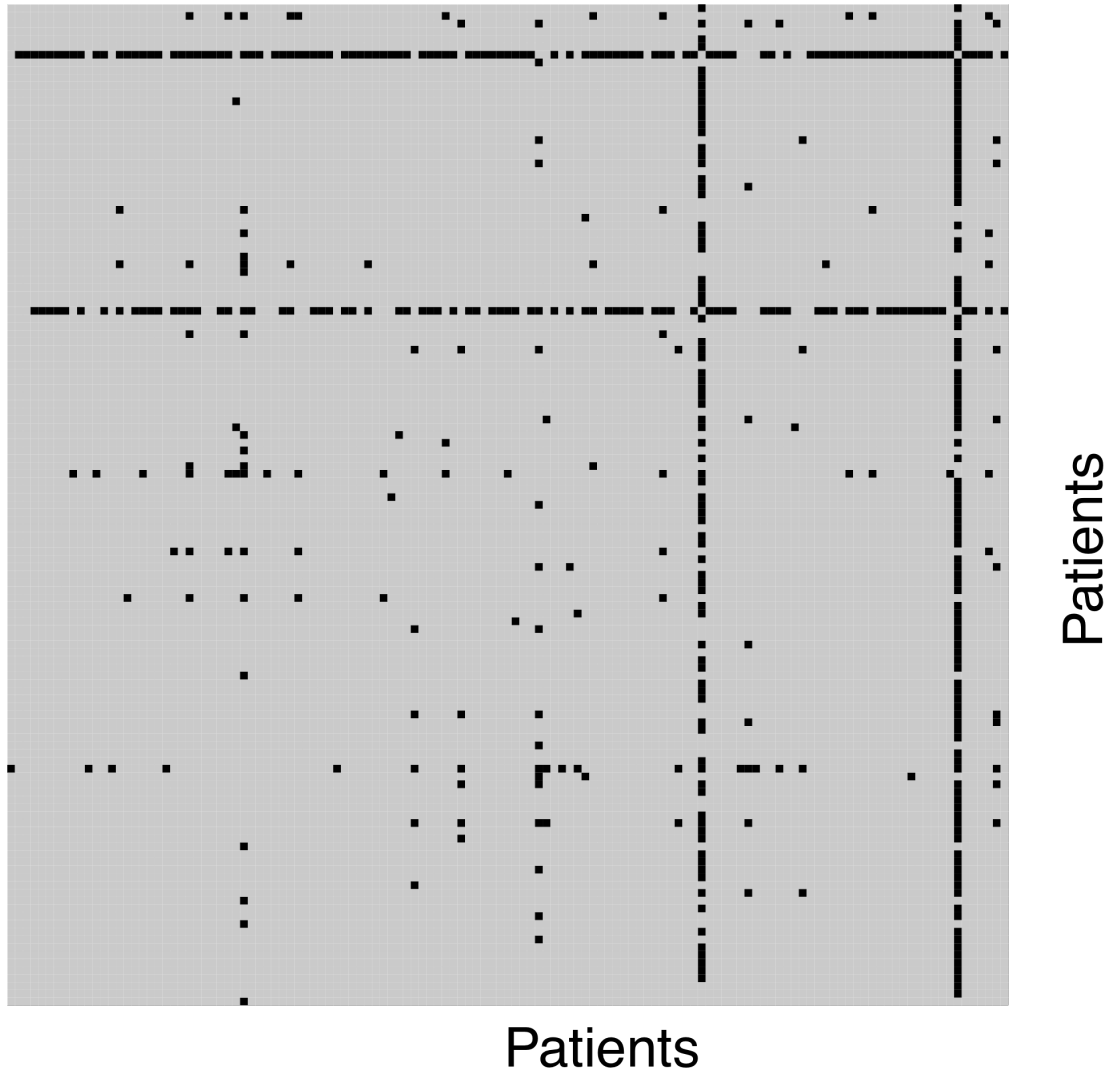

**Supplementary Figure 2. Heatmap of patient-patient correlations.** Using the WPEC matrix we computed patient-patient correlations for 129 patients. The heatmap of dichotomized correlations (black=negative and gray=positive) identified two patients as outliers with completely opposite correlations from the rest. We removed these two patients due to potential array quality issues.
