# Supplementary material for: Dissecting Inflammatory Complications in Critically Injured Patients by Within-Patient Gene Expression Changes: A Longitudinal Clinical Genomics Study
Source: PLOS journal article supplement (doi:10.1371/journal.pmed.1001093), 2011-09-13
Supplement: S9 (10.1371/journal.pmed.1001093.s009) [file journal.pmed.1001093.s009]

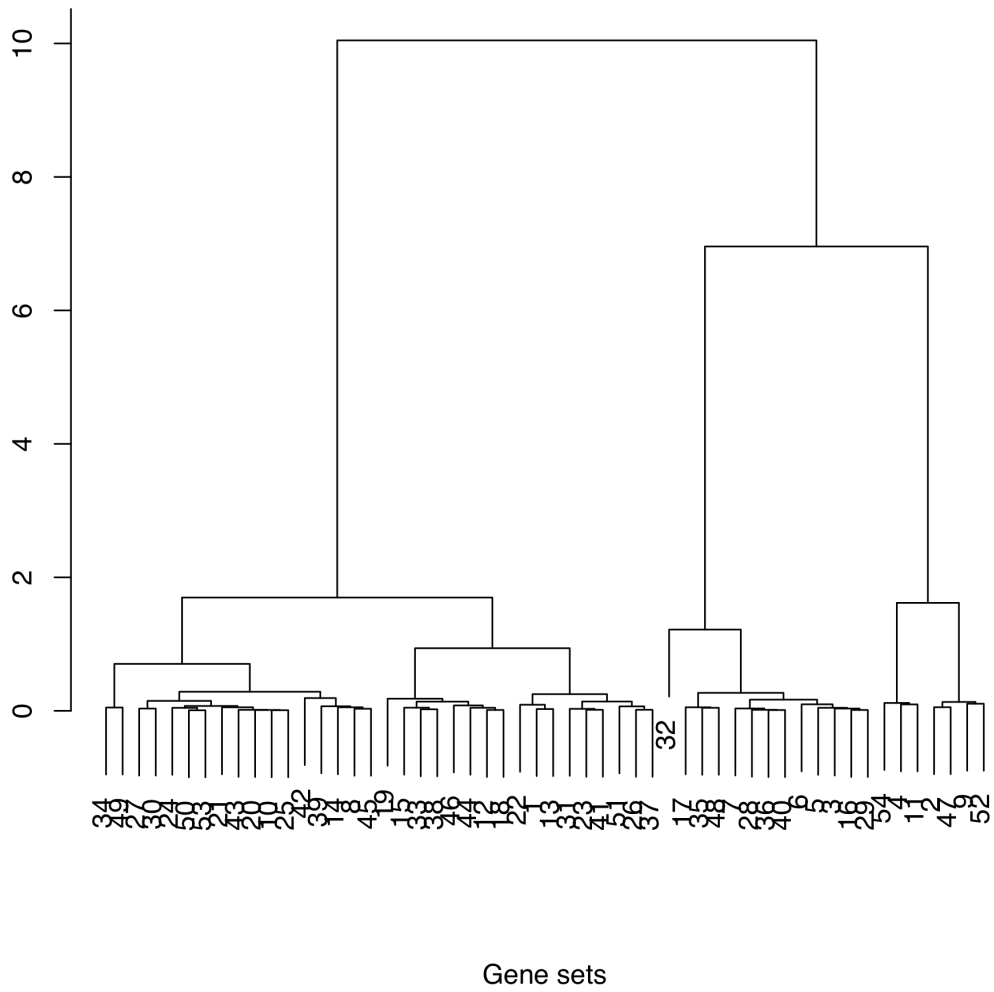

**Supplementary Figure 8. The dendrogram for grouping the 54 functional related gene sets into 5 modules according to the similarity of their dominant trajectories across the ocMOF subgroups.**
