# Supplementary material for: Dissecting Inflammatory Complications in Critically Injured Patients by Within-Patient Gene Expression Changes: A Longitudinal Clinical Genomics Study
Source: PLOS journal article supplement (doi:10.1371/journal.pmed.1001093), 2011-09-13
Supplement: S26 (10.1371/journal.pmed.1001093.s026) [file journal.pmed.1001093.s026]

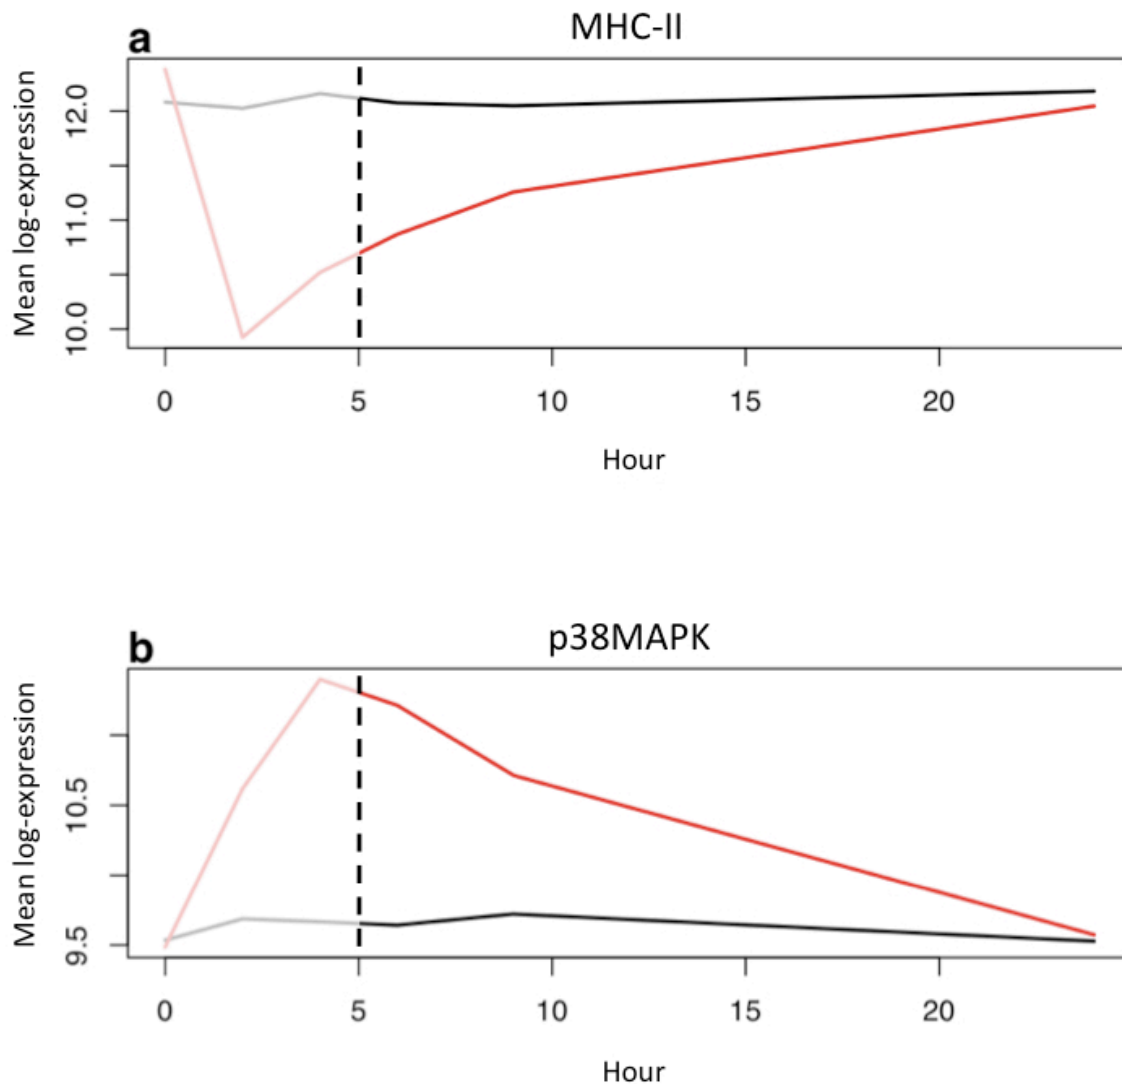

**Supplementary Figure 25. Gene expression profiles of MHC-II and p38MAPK in a controlled endotoxin experiment. a-b,** The mean of the log-expression of MHC-II (shown in **a**) and p38MAPK (shown in **b**). The black and red lines correspond to the healthy patients administered with placebo and endotoxin, respectively. After hour 5 (the region to the right of the dotted vertical line), the mean trajectories corresponding to healthy patients administered with endotoxin are similar to the dominant trajectories of *ocMOF i* and *ii*.
