# Supplementary material for: Dissecting Inflammatory Complications in Critically Injured Patients by Within-Patient Gene Expression Changes: A Longitudinal Clinical Genomics Study
Source: PLoS Med. 2011 Sep 13;8(9):e1001093. doi: 10.1371/journal.pmed.1001093 (PMC3172280; doi:10.1371/journal.pmed.1001093)
Supplement: Table S4 — Fifty-four functional related gene sets from DAVID for the 3,663 significant (FDR = 10%) probesets. (XLS) [file pmed.1001093.s030.xls]

## Sheet: David3663WPEC.txt
Gene Group 1 (Module D)	Enrichment Score: 15.135760912085946
AFFYMETRIX_3PRIME_IVT_ID	Gene Name
1559127_x_at, 1559126_at	ribosomal RNA processing 12 homolog (S. cerevisiae)
223631_s_at	chromosome 19 open reading frame 33
218859_s_at	similar to ABT1-associated protein; ESF1, nucleolar pre-rRNA processing protein, homolog (S. cerevisiae)
225509_at, 219129_s_at	SAP30-like
218889_at	nucleolar complex associated 3 homolog (S. cerevisiae)
213188_s_at, 213189_at	MYC induced nuclear antigen
221514_at	UTP14, U3 small nucleolar ribonucleoprotein, homolog A (yeast)
224968_at	coiled-coil domain containing 104
212018_s_at	ribosomal L1 domain containing 1
214661_s_at	NOP14 nucleolar protein homolog (yeast)
228408_s_at	SDA1 domain containing 1
229558_at	chromosome 16 open reading frame 88
201922_at	hypothetical gene supported by NM_014886; TGF beta-inducible nuclear protein 1; similar to TGF beta-inducible nuclear protein 1
209486_at	UTP3, small subunit (SSU) processome component, homolog (S. cerevisiae)
211686_s_at	MAK16 homolog (S. cerevisiae)
225866_at	brix domain containing 1 pseudogene; brix domain containing 1
234339_s_at, 217807_s_at	glioma tumor suppressor candidate region gene 2; glioma tumor suppressor candidate region gene 2 pseudogene
222605_at	REST corepressor 3
Gene Group 2 (Module A)	Enrichment Score: 12.340118841412465
AFFYMETRIX_3PRIME_IVT_ID	Gene Name
208804_s_at	splicing factor, arginine/serine-rich 6; similar to arginine/serine-rich splicing factor 6
222496_s_at, 218035_s_at, 1565597_at	RNA binding motif protein 47
1554569_a_at	CUG triplet repeat, RNA binding protein 2
214698_at, 214697_s_at	ROD1 regulator of differentiation 1 (S. pombe)
226975_at	RNA-binding region (RNP1, RRM) containing 3
213152_s_at, 238929_at, 228760_at, 214789_x_at	splicing factor, arginine/serine-rich 2B
224831_at, 242384_at, 224828_at	cytoplasmic polyadenylation element binding protein 4
Gene Group 3 (Module E)	Enrichment Score: 10.159505147902674
AFFYMETRIX_3PRIME_IVT_ID	Gene Name
242146_at	small nuclear ribonucleoprotein polypeptide A'
221919_at	heterogeneous nuclear ribonucleoprotein A1-like 3; similar to heterogeneous nuclear ribonucleoprotein A1; heterogeneous nuclear ribonucleoprotein A1 pseudogene 2; heterogeneous nuclear ribonucleoprotein A1; heterogeneous nuclear ribonucleoprotein A1 pseudogene
227979_at	RNA binding motif protein 4B
202408_s_at	PRP31 pre-mRNA processing factor 31 homolog (S. cerevisiae)
213152_s_at, 238929_at, 228760_at, 214789_x_at	splicing factor, arginine/serine-rich 2B
227110_at	heterogeneous nuclear ribonucleoprotein C (C1/C2)
201031_s_at	heterogeneous nuclear ribonucleoprotein H1 (H)
225593_at	LSM10, U7 small nuclear RNA associated
213742_at, 200686_s_at, 200685_at, 236948_x_at	splicing factor, arginine/serine-rich 11
219119_at	LSM8 homolog, U6 small nuclear RNA associated (S. cerevisiae)
230270_at	PRP38 pre-mRNA processing factor 38 (yeast) domain containing B
201544_x_at	poly(A) binding protein, nuclear 1
211929_at, 211932_at	heterogeneous nuclear ribonucleoprotein A3
213649_at	splicing factor, arginine/serine-rich 7, 35kDa
202903_at	LSM5 homolog, U6 small nuclear RNA associated (S. cerevisiae)
201376_s_at	heterogeneous nuclear ribonucleoprotein F
201406_at	ribosomal protein L36a pseudogene 51; ribosomal protein L36a pseudogene 37; ribosomal protein L36a pseudogene 49; heterogeneous nuclear ribonucleoprotein H2 (H'); ribosomal protein L36a
201221_s_at	small nuclear ribonucleoprotein 70kDa (U1)
201356_at, 227516_at	splicing factor 3a, subunit 1, 120kDa
200097_s_at	heterogeneous nuclear ribonucleoprotein K; similar to heterogeneous nuclear ribonucleoprotein K
226975_at	RNA-binding region (RNP1, RRM) containing 3
208804_s_at	splicing factor, arginine/serine-rich 6; similar to arginine/serine-rich splicing factor 6
213593_s_at, 229574_at	transformer 2 alpha homolog (Drosophila)
213762_x_at, 225310_at	similar to RNA binding motif protein, X-linked; similar to hCG2011544; RNA binding motif protein, X-linked
203380_x_at, 212266_s_at	splicing factor, arginine/serine-rich 5
232004_at	heterogeneous nuclear ribonucleoprotein R
233208_x_at	cleavage and polyadenylation specific factor 2, 100kDa
212030_at, 1557081_at, 212031_at, 212033_at, 212027_at	RNA binding motif protein 25
Gene Group 4 (Module B)	Enrichment Score: 9.801470498423882
AFFYMETRIX_3PRIME_IVT_ID	Gene Name
214661_s_at	NOP14 nucleolar protein homolog (yeast)
239790_s_at	exosome component 2
221514_at	UTP14, U3 small nucleolar ribonucleoprotein, homolog A (yeast)
218462_at	brix domain containing 5
218715_at	UTP6, small subunit (SSU) processome component, homolog (yeast)
212499_s_at	FCF1 small subunit (SSU) processome component homolog (S. cerevisiae)
204405_x_at, 217106_x_at, 226480_at	DIM1 dimethyladenosine transferase 1-like (S. cerevisiae)
201922_at	hypothetical gene supported by NM_014886; TGF beta-inducible nuclear protein 1; similar to TGF beta-inducible nuclear protein 1
217962_at	NOP10 ribonucleoprotein homolog (yeast)
235038_at	KRR1, small subunit (SSU) processome component, homolog (yeast)
91684_g_at, 58696_at, 218695_at	exosome component 4
214427_at	NOP2 nucleolar protein homolog (yeast)
211623_s_at	fibrillarin
Gene Group 5 (Module E)	Enrichment Score: 8.445752312983986
AFFYMETRIX_3PRIME_IVT_ID	Gene Name
213649_at	splicing factor, arginine/serine-rich 7, 35kDa
227979_at	RNA binding motif protein 4B
218478_s_at	zinc finger, CCHC domain containing 8
223716_s_at	zinc finger, RAN-binding domain containing 2
1553274_a_at	small nuclear ribonucleoprotein 48kDa (U11/U12)
Gene Group 6 (Module E)	Enrichment Score: 8.412993635319285
AFFYMETRIX_3PRIME_IVT_ID	Gene Name
226934_at	cleavage and polyadenylation specific factor 6, 68kDa
212455_at	YTH domain containing 1
211929_at, 211932_at	heterogeneous nuclear ribonucleoprotein A3
208610_s_at, 207435_s_at	serine/arginine repetitive matrix 2; hypothetical LOC100132779
202251_at	PRP3 pre-mRNA processing factor 3 homolog (S. cerevisiae)
212030_at, 1557081_at, 212031_at, 212033_at, 212027_at	RNA binding motif protein 25
201225_s_at, 201224_s_at	serine/arginine repetitive matrix 1
202408_s_at	PRP31 pre-mRNA processing factor 31 homolog (S. cerevisiae)
Gene Group 7 (Module E)	Enrichment Score: 7.704847175364681
AFFYMETRIX_3PRIME_IVT_ID	Gene Name
203156_at	A kinase (PRKA) anchor protein 11
232509_at, 244511_at	hypothetical protein LOC100134230; similar to KIAA0454 protein; similar to phosphodiesterase 4D interacting protein isoform 2; phosphodiesterase 4D interacting protein
226317_at, 225519_at	protein phosphatase 4, regulatory subunit 2
212675_s_at	centrosomal protein 68kDa
237958_at	microcephalin 1
225484_at	testis specific, 14
218827_s_at	centrosomal protein 192kDa
213956_at	centrosomal protein 350kDa
Gene Group 8 (Module C)	Enrichment Score: 6.827146165425005
AFFYMETRIX_3PRIME_IVT_ID	Gene Name
216380_x_at	ribosomal protein S28 pseudogene 6; ribosomal protein S28 pseudogene 9; ribosomal protein S28
200026_at	ribosomal protein L34
200010_at	ribosomal protein L11
213377_x_at	ribosomal protein S12; ribosomal protein S12 pseudogene 4; ribosomal protein S12 pseudogene 11; ribosomal protein S12 pseudogene 9
213941_x_at	ribosomal protein S7; ribosomal protein S7 pseudogene 11; ribosomal protein S7 pseudogene 4; ribosomal protein S7 pseudogene 10
208646_at	ribosomal protein S14
201094_at	ribosomal protein S29 pseudogene 11; ribosomal protein S29 pseudogene 16; ribosomal protein S29 pseudogene 17; ribosomal protein S29 pseudogene 3; ribosomal protein S29 pseudogene 9; ribosomal protein S29
200937_s_at	ribosomal protein L5 pseudogene 34; ribosomal protein L5 pseudogene 1; ribosomal protein L5
200092_s_at	ribosomal protein L37
221476_s_at	ribosomal protein L15 pseudogene 22; ribosomal protein L15 pseudogene 18; ribosomal protein L15 pseudogene 17; ribosomal protein L15 pseudogene 3; ribosomal protein L15 pseudogene 7; ribosomal protein L15
200032_s_at	ribosomal protein L9; ribosomal protein L9 pseudogene 25
221989_at, 200725_x_at, 217379_at	ribosomal protein L10; ribosomal protein L10 pseudogene 15; ribosomal protein L10 pseudogene 6; ribosomal protein L10 pseudogene 16; ribosomal protein L10 pseudogene 9
217466_x_at	ribosomal protein S2 pseudogene 8; ribosomal protein S2 pseudogene 11; ribosomal protein S2 pseudogene 5; ribosomal protein S2 pseudogene 12; ribosomal protein S2 pseudogene 51; ribosomal protein S2 pseudogene 17; ribosomal protein S2 pseudogene 55; ribosomal protein S2 pseudogene 20; ribosomal protein S2
201909_at	ribosomal protein S4, Y-linked 1
214271_x_at, 200088_x_at, 200809_x_at	ribosomal protein L12 pseudogene 2; ribosomal protein L12 pseudogene 32; ribosomal protein L12 pseudogene 35; ribosomal protein L12 pseudogene 19; ribosomal protein L12 pseudogene 6; ribosomal protein L12; ribosomal protein L12 pseudogene 14
200715_x_at	ribosomal protein L13a pseudogene 7; ribosomal protein L13a pseudogene 5; ribosomal protein L13a pseudogene 16; ribosomal protein L13a; ribosomal protein L13a pseudogene 18
211976_at	ribosomal protein L35; ribosomal protein L35 pseudogene 1; ribosomal protein L35 pseudogene 2
200926_at	ribosomal protein S23
200018_at	ribosomal protein S13 pseudogene 8; ribosomal protein S13; ribosomal protein S13 pseudogene 2
200717_x_at, 212042_x_at	ribosomal protein L7 pseudogene 26; ribosomal protein L7 pseudogene 16; ribosomal protein L7; ribosomal protein L7 pseudogene 32; ribosomal protein L7 pseudogene 23; ribosomal protein L7 pseudogene 24; ribosomal protein L7 pseudogene 20
200741_s_at	ribosomal protein S27 pseudogene 29; ribosomal protein S27 pseudogene 9; ribosomal protein S27 pseudogene 23; ribosomal protein S27 pseudogene 13; ribosomal protein S27; ribosomal protein S27 pseudogene 21; ribosomal protein S27 pseudogene 7; ribosomal protein S27 pseudogene 6; ribosomal protein S27 pseudogene 19
Gene Group 9 (Module A)	Enrichment Score: 6.5637217837330395
AFFYMETRIX_3PRIME_IVT_ID	Gene Name
201990_s_at, 201989_s_at	cAMP responsive element binding protein-like 2
222728_s_at	TATA box binding protein (TBP)-associated factor, RNA polymerase I, D, 41kDa; small nucleolar RNA, H/ACA box 32; small nucleolar RNA, H/ACA box 25
205965_at	basic leucine zipper transcription factor, ATF-like
235409_at	MAX gene associated
205702_at, 215285_s_at, 234618_at, 210191_s_at, 235844_at	putative homeodomain transcription factor 1
228846_at, 226275_at, 206877_at	MAX dimerization protein 1
227637_at	transcription factor CP2
Gene Group 10 (Module C)	Enrichment Score: 5.894933646527112
AFFYMETRIX_3PRIME_IVT_ID	Gene Name
222816_s_at, 233425_at	zinc finger, CCHC domain containing 2
213853_at	DnaJ (Hsp40) homolog, subfamily C, member 24
1566852_at	tripartite motif-containing 42
225830_at	PDZ domain containing 8
230298_at	metallo-beta-lactamase domain containing 2
214281_s_at, 212749_s_at	ring finger and CHY zinc finger domain containing 1
220606_s_at, 223401_at	chromosome 17 open reading frame 48
206567_s_at	PHD finger protein 20
218967_s_at	phosphotriesterase related
222760_at	zinc finger protein 703
226326_at, 229194_at, 227935_s_at	polycomb group ring finger 5
215031_x_at	ring finger protein 126
218071_s_at	makorin ring finger protein 2
226758_at	LUC7-like 2 (S. cerevisiae)
1556543_at, 226496_at	zinc finger, CCHC domain containing 7
201780_s_at	ring finger protein 13
1555789_s_at, 223081_at	PHD finger protein 23
242808_at	ring finger protein 169
210458_s_at	TRAF family member-associated NFKB activator
218919_at	zinc finger, AN1-type domain 1
218263_s_at	zinc finger, BED-type containing 5
218059_at	zinc finger protein 706
207801_s_at	ring finger protein 10
230408_at	polycomb group ring finger 3
226542_at, 204669_s_at, 210706_s_at, 204668_at	ring finger protein 24
212485_at	G patch domain containing 8
213390_at	zinc finger CCCH-type containing 4
216399_s_at	S-phase cyclin A-associated protein in the ER
225005_at	PHD finger protein 13
217760_at, 217759_at	tripartite motif-containing 44
201297_s_at, 201298_s_at	MOB1, Mps One Binder kinase activator-like 1B (yeast)
203585_at	zinc finger protein 185 (LIM domain)
227536_at	zinc finger CCCH-type containing 13
Gene Group 11 (Module B)	Enrichment Score: 5.097598112900346
AFFYMETRIX_3PRIME_IVT_ID	Gene Name
204014_at	dual specificity phosphatase 4
213848_at	dual specificity phosphatase 7
213521_at, 203555_at	protein tyrosine phosphatase, non-receptor type 18 (brain-derived)
228853_at	serine/threonine/tyrosine interacting protein
234740_at, 208022_s_at	CDC14 cell division cycle 14 homolog B (S. cerevisiae)
Gene Group 12 (Module D)	Enrichment Score: 5.094843287109886
AFFYMETRIX_3PRIME_IVT_ID	Gene Name
213138_at	AT rich interactive domain 5A (MRF1-like)
212614_at, 241837_at, 1563469_at	AT rich interactive domain 5B (MRF1-like)
217909_s_at	MAX-like protein X
238005_s_at	SIN3 homolog A, transcription regulator (yeast)
225800_at, 225798_at	JAZF zinc finger 1
240415_at	interferon regulatory factor 2
229881_at	Kruppel-like factor 12
213311_s_at, 221495_s_at	transcription factor 25 (basic helix-loop-helix)
202979_s_at	CREB/ATF bZIP transcription factor
203247_s_at	zinc finger protein 24
223566_s_at	BCL6 co-repressor
211176_s_at	paired box 4
218486_at	Kruppel-like factor 11
212347_x_at	MAX dimerization protein 4
202814_s_at	hexamethylene bis-acetamide inducible 1
202963_at	regulatory factor X, 5 (influences HLA class II expression)
215760_s_at, 204166_at	strawberry notch homolog 2 (Drosophila)
241365_at, 203408_s_at	SATB homeobox 1
209352_s_at	SIN3 homolog B, transcription regulator (yeast)
211698_at, 208670_s_at	EP300 interacting inhibitor of differentiation 1
202616_s_at	methyl CpG binding protein 2 (Rett syndrome)
207654_x_at, 216652_s_at	down-regulator of transcription 1, TBP-binding (negative cofactor 2)
218401_s_at	zinc finger protein 281
218082_s_at	upstream binding protein 1 (LBP-1a)
201083_s_at, 229454_at, 201084_s_at	similar to Bcl-2-associated transcription factor 1 (Btf); BCL2-associated transcription factor 1
223492_s_at	leucine rich repeat (in FLII) interacting protein 1
Gene Group 13 (Module D)	Enrichment Score: 4.935847440013693
AFFYMETRIX_3PRIME_IVT_ID	Gene Name
212615_at	chromodomain helicase DNA binding protein 9
201211_s_at, 212514_x_at	DEAD (Asp-Glu-Ala-Asp) box polypeptide 3, X-linked
214805_at	similar to eukaryotic translation initiation factor 4A; small nucleolar RNA, H/ACA box 67; eukaryotic translation initiation factor 4A, isoform 1
228152_s_at	DEAD (Asp-Glu-Ala-Asp) box polypeptide 60-like
227447_at	superkiller viralicidic activity 2-like 2 (S. cerevisiae)
203785_s_at	DEAD (Asp-Glu-Ala-Asp) box polypeptide 28
225549_at	DEAD (Asp-Glu-Ala-Asp) box polypeptide 6
217884_at	N-acetyltransferase 10 (GCN5-related)
208152_s_at	DEAD (Asp-Glu-Ala-Asp) box polypeptide 21
225026_at	chromodomain helicase DNA binding protein 6
220890_s_at	DEAD (Asp-Glu-Ala-Asp) box polypeptide 47
221699_s_at	DEAD (Asp-Glu-Ala-Asp) box polypeptide 50
208896_at	DEAD (Asp-Glu-Ala-Asp) box polypeptide 18
204558_at	RAD54-like (S. cerevisiae)
200058_s_at	similar to U5 snRNP-specific protein, 200 kDa; small nuclear ribonucleoprotein 200kDa (U5)
200694_s_at, 200702_s_at	DEAD (Asp-Glu-Ala-Asp) box polypeptide 24
223139_s_at	DEAH (Asp-Glu-Ala-His) box polypeptide 36
213077_at	YTH domain containing 2
202577_s_at	DEAD (Asp-Glu-Ala-As) box polypeptide 19A
1570360_s_at	DEAD (Asp-Glu-Ala-Asp) box polypeptide 3, Y-linked
232013_at	chromosome 9 open reading frame 102
1553181_at	DEAD (Asp-Glu-Ala-Asp) box polypeptide 31
215693_x_at, 219108_x_at	DEAD (Asp-Glu-Ala-Asp) box polypeptide 27
209430_at	BTAF1 RNA polymerase II, B-TFIID transcription factor-associated, 170kDa (Mot1 homolog, S. cerevisiae)
228285_at	tudor domain containing 9
Gene Group 14 (Module C)	Enrichment Score: 4.919738133616936
AFFYMETRIX_3PRIME_IVT_ID	Gene Name
227708_at	eukaryotic translation elongation factor 1 alpha-like 7; eukaryotic translation elongation factor 1 alpha-like 3; similar to eukaryotic translation elongation factor 1 alpha 1; eukaryotic translation elongation factor 1 alpha 1
225153_at, 225158_at	G elongation factor, mitochondrial 1
224935_at	eukaryotic translation initiation factor 2, subunit 3 gamma, 52kDa
201024_x_at	eukaryotic translation initiation factor 5B
204540_at	eukaryotic translation elongation factor 1 alpha 2
219243_at	GTPase, IMAP family member 4
Gene Group 15 (Module D)	Enrichment Score: 4.908779296830855
AFFYMETRIX_3PRIME_IVT_ID	Gene Name
221493_at	TSPY-like 1
204749_at	nucleosome assembly protein 1-like 3
228062_at	nucleosome assembly protein 1-like 5
1560339_s_at	nucleosome assembly protein 1-like 4
214290_s_at, 218280_x_at, 218279_s_at	histone cluster 2, H2aa3; histone cluster 2, H2aa4
215071_s_at	histone cluster 1, H2ac
230664_at	H2B histone family, member M
212205_at	H2A histone family, member V
214537_at	histone cluster 1, H1d
214554_at	histone cluster 1, H2ag; histone cluster 1, H2ah; histone cluster 1, H2ai; histone cluster 1, H2ak; histone cluster 1, H2al; histone cluster 1, H2am
208754_s_at, 1556121_at	nucleosome assembly protein 1-like 1
Gene Group 16 (Module E)	Enrichment Score: 4.608246077311555
AFFYMETRIX_3PRIME_IVT_ID	Gene Name
225170_at	WD repeat domain 5
204507_s_at, 235071_at	WD repeat domain 92
226180_at	WD repeat domain 36
1558956_s_at, 226098_at	intraflagellar transport 80 homolog (Chlamydomonas)
214662_at	WD repeat domain 43
213031_s_at	WD repeat domain 73
231713_s_at	elongation protein 2 homolog (S. cerevisiae)
204431_at	transducin-like enhancer of split 2 (E(sp1) homolog, Drosophila)
201760_s_at, 213734_at	WD repeat and SOCS box-containing 2
56919_at	WD repeat domain 48
1554558_at	WD repeat domain 22
223068_at	echinoderm microtubule associated protein like 4
211724_x_at	missing oocyte, meiosis regulator, homolog (Drosophila)
235195_at	F-box and WD repeat domain containing 2
239858_at	transducin (beta)-like 1Y-linked
201606_s_at	PWP1 homolog (S. cerevisiae)
1562516_at	WD repeat domain 60
224897_at, 224905_at, 224898_at	WD repeat domain 26
219040_at	coronin 7
218090_s_at, 229694_at	bromodomain and WD repeat domain containing 2
1561589_a_at	neurobeachin-like 1
236698_at	similar to dynein cytoplasmic 1 intermediate chain 2; dynein, cytoplasmic 1, intermediate chain 2
218971_s_at	WD repeat domain 91
204366_s_at, 212429_s_at	general transcription factor IIIC, polypeptide 2, beta 110kDa
214109_at, 212692_s_at	LPS-responsive vesicle trafficking, beach and anchor containing
218882_s_at	WD repeat domain 3
241472_at	Dmx-like 1
201934_at	WD repeat domain 82
200609_s_at	WD repeat domain 1
224721_at	WD repeat domain 75
229389_at	ATG16 autophagy related 16-like 2 (S. cerevisiae)
226283_at	WD repeat domain 51B
201886_at	WD repeat domain 23
229141_at	WD repeat domain 33
Gene Group 17 (Module E)	Enrichment Score: 4.516690788353282
AFFYMETRIX_3PRIME_IVT_ID	Gene Name
1569098_s_at	tumor protein p53 binding protein 1
212696_s_at	ring finger protein 4; hypothetical LOC644006
204099_at	SWI/SNF related, matrix associated, actin dependent regulator of chromatin, subfamily d, member 3
1570299_at	mastermind-like 2 (Drosophila)
227150_at, 205322_s_at, 205323_s_at	metal-regulatory transcription factor 1
226775_at, 226776_at	enhancer of yellow 2 homolog (Drosophila)
209358_at	TAF11 RNA polymerase II, TATA box binding protein (TBP)-associated factor, 28kDa
1554576_a_at	ets variant 4
207924_x_at	paired box 8
202216_x_at, 211797_s_at, 211251_x_at	nuclear transcription factor Y, gamma
207078_at	mediator complex subunit 6
230657_at	clock homolog (mouse)
216071_x_at, 203506_s_at	mediator complex subunit 12
206838_at	T-box 19
202611_s_at	mediator complex subunit 14
224864_at, 224130_s_at	steroid receptor RNA activator 1
209289_at	nuclear factor I/B
203692_s_at	E2F transcription factor 3
221260_s_at	cysteine-serine-rich nuclear protein 2
225053_at	CCR4-NOT transcription complex, subunit 7
Gene Group 18 (Module D)	Enrichment Score: 4.435746911871848
AFFYMETRIX_3PRIME_IVT_ID	Gene Name
205543_at	heat shock 70kDa protein 4-like
233589_x_at	chromosome 9 open reading frame 167
226725_at	schlafen family member 5
227585_at	ATPase family, AAA domain containing 1
239852_at	methylmalonic aciduria (cobalamin deficiency) cblA type
222025_s_at	5-oxoprolinase (ATP-hydrolysing)
Gene Group 19 (Module D)	Enrichment Score: 4.273081421870574
AFFYMETRIX_3PRIME_IVT_ID	Gene Name
218838_s_at	tetratricopeptide repeat domain 31
235597_s_at	RANBP2-like and GRIP domain containing 1; RANBP2-like and GRIP domain containing 2
203122_at	tetratricopeptide repeat domain 15
229450_at, 204747_at	interferon-induced protein with tetratricopeptide repeats 3
226557_at	tetratricopeptide repeat domain 5
46167_at	tetratricopeptide repeat domain 4
212009_s_at	stress-induced-phosphoprotein 1
225178_at, 225180_at	tetratricopeptide repeat domain 14
203153_at	interferon-induced protein with tetratricopeptide repeats 1
1556053_at	DnaJ (Hsp40) homolog, subfamily C, member 7
Gene Group 20 (Module C)	Enrichment Score: 3.5659704877799503
AFFYMETRIX_3PRIME_IVT_ID	Gene Name
227934_at, 229317_at	karyopherin alpha 5 (importin alpha 6)
226428_at	transportin 2
225766_s_at, 209226_s_at	transportin 1
235927_at	exportin 1 (CRM1 homolog, yeast)
211982_x_at, 214784_x_at	exportin 6
209653_at	karyopherin alpha 4 (importin alpha 3)
200994_at	importin 7
202058_s_at	karyopherin alpha 1 (importin alpha 5)
234304_s_at	importin 11
213573_at	karyopherin (importin) beta 1
Gene Group 21 (Module C)	Enrichment Score: 3.316279477054003
AFFYMETRIX_3PRIME_IVT_ID	Gene Name
234987_at	mitochondrial ribosomal protein 63
222275_at	mitochondrial ribosomal protein S30
220526_s_at	similar to mitochondrial ribosomal protein L20; mitochondrial ribosomal protein L20
222997_s_at	mitochondrial ribosomal protein S21
204599_s_at	mitochondrial ribosomal protein L28
Gene Group 22 (Module D)	Enrichment Score: 3.1690173124183425
AFFYMETRIX_3PRIME_IVT_ID	Gene Name
214107_x_at, 201454_s_at, 201455_s_at, 215090_x_at	hypothetical protein FLJ11822; aminopeptidase puromycin sensitive
227567_at	archaelysin family metallopeptidase 2
209045_at	X-prolyl aminopeptidase (aminopeptidase P) 1, soluble
38703_at, 217604_at	aspartyl aminopeptidase
230032_at	O-sialoglycoprotein endopeptidase-like 1
217933_s_at	leucine aminopeptidase 3
Gene Group 23 (Module D)	Enrichment Score: 2.993172058099308
AFFYMETRIX_3PRIME_IVT_ID	Gene Name
210190_at	syntaxin 11
212625_at	syntaxin 10
221500_s_at	syntaxin 16
222708_s_at, 228091_at	syntaxin 17
223023_at	blocked early in transport 1 homolog (S. cerevisiae)-like
Gene Group 24 (Module C)	Enrichment Score: 2.9595128052478183
AFFYMETRIX_3PRIME_IVT_ID	Gene Name
217726_at	coatomer protein complex, subunit zeta 1
201264_at	coatomer protein complex, subunit epsilon
201583_s_at	Sec23 homolog B (S. cerevisiae)
64418_at, 221937_at	AP1 gamma subunit binding protein 1
212161_at	adaptor-related protein complex 2, alpha 2 subunit
1555733_s_at	adaptor-related protein complex 1, sigma 3 subunit
243745_at, 230413_s_at, 230264_s_at, 203299_s_at, 203300_x_at	adaptor-related protein complex 1, sigma 2 subunit pseudogene; adaptor-related protein complex 1, sigma 2 subunit
Gene Group 25 (Module C)	Enrichment Score: 2.9271873104271617
AFFYMETRIX_3PRIME_IVT_ID	Gene Name
204184_s_at	adrenergic, beta, receptor kinase 2
238624_at	nemo-like kinase
207945_s_at	casein kinase 1, delta
226166_x_at	serine/threonine kinase 36, fused homolog (Drosophila)
1566701_at, 221999_at	vaccinia related kinase 3
203229_s_at	CDC-like kinase 2
206114_at	EPH receptor A4
210059_s_at, 210058_at	mitogen-activated protein kinase 13
205698_s_at	mitogen-activated protein kinase kinase 6
212629_s_at	protein kinase N2
239162_at, 203139_at	death-associated protein kinase 1
227013_at, 223380_s_at	LATS, large tumor suppressor, homolog 2 (Drosophila)
202199_s_at, 202200_s_at	SFRS protein kinase 1
202970_at	dual-specificity tyrosine-(Y)-phosphorylation regulated kinase 2
204063_s_at	unc-51-like kinase 2 (C. elegans)
218520_at	TANK-binding kinase 1
209018_s_at, 209019_s_at	PTEN induced putative kinase 1
40225_at	cyclin G associated kinase
235085_at	homolog of rat pragma of Rnd2
235780_at	protein kinase, cAMP-dependent, catalytic, beta
206216_at	SFRS protein kinase 3
206482_at	PTK6 protein tyrosine kinase 6
204068_at	serine/threonine kinase 3 (STE20 homolog, yeast)
206296_x_at	mitogen-activated protein kinase kinase kinase kinase 1
210379_s_at	tousled-like kinase 1
40420_at	serine/threonine kinase 10
222548_s_at, 206571_s_at, 218181_s_at, 222547_at	mitogen-activated protein kinase kinase kinase kinase 4
241871_at	calcium/calmodulin-dependent protein kinase IV
205805_s_at	receptor tyrosine kinase-like orphan receptor 1
209666_s_at	conserved helix-loop-helix ubiquitous kinase
213490_s_at	mitogen-activated protein kinase kinase 2 pseudogene; mitogen-activated protein kinase kinase 2
202569_s_at, 202568_s_at	MAP/microtubule affinity-regulating kinase 3
215776_at	insulin receptor-related receptor
227131_at	mitogen-activated protein kinase kinase kinase 3
210582_s_at, 202193_at, 217475_s_at	LIM domain kinase 2
204604_at	PFTAIRE protein kinase 1
209622_at, 238572_at	serine/threonine kinase 16
210787_s_at, 212252_at	calcium/calmodulin-dependent protein kinase kinase 2, beta
203104_at	colony stimulating factor 1 receptor
226853_at	BMP2 inducible kinase
203379_at	ribosomal protein S6 kinase, 90kDa, polypeptide 1
202788_at	mitogen-activated protein kinase-activated protein kinase 3
206279_at	protein kinase, Y-linked
202140_s_at	CDC-like kinase 3
1552578_a_at	myosin IIIB
210962_s_at, 215483_at	A kinase (PRKA) anchor protein (yotiao) 9
239859_x_at	cyclin-dependent kinase-like 1 (CDC2-related kinase)
1562026_at	WNK lysine deficient protein kinase 2
243256_at	MAP kinase interacting serine/threonine kinase 1
226375_at	lemur tyrosine kinase 2
207073_at	cyclin-dependent kinase-like 2 (CDC2-related kinase)
205418_at	feline sarcoma oncogene
Gene Group 26 (Module D)	Enrichment Score: 2.856498116360035
AFFYMETRIX_3PRIME_IVT_ID	Gene Name
202164_s_at, 202162_s_at	CCR4-NOT transcription complex, subunit 8
227637_at	transcription factor CP2
225504_at	homeobox containing 1
206015_s_at	forkhead box J3
201990_s_at, 201989_s_at	cAMP responsive element binding protein-like 2
203973_s_at, 213006_at	CCAAT/enhancer binding protein (C/EBP), delta
236796_at	BTB and CNC homology 1, basic leucine zipper transcription factor 2
209782_s_at	D site of albumin promoter (albumin D-box) binding protein
205965_at	basic leucine zipper transcription factor, ATF-like
212345_s_at	cAMP responsive element binding protein 3-like 2
205931_s_at, 229228_at	cAMP responsive element binding protein 5
Gene Group 27 (Module C)	Enrichment Score: 2.8423651773216387
AFFYMETRIX_3PRIME_IVT_ID	Gene Name
228109_at	Ras protein-specific guanine nucleotide-releasing factor 2
213039_at	Rho/Rac guanine nucleotide exchange factor (GEF) 18
217576_x_at, 211665_s_at, 212870_at	son of sevenless homolog 2 (Drosophila)
1553906_s_at	FYVE, RhoGEF and PH domain containing 2
209539_at	Rac/Cdc42 guanine nucleotide exchange factor (GEF) 6
234992_x_at	epithelial cell transforming sequence 2 oncogene
Gene Group 28 (Module E)	Enrichment Score: 2.576126627082893
AFFYMETRIX_3PRIME_IVT_ID	Gene Name
219826_at, 58367_s_at	zinc finger protein 419
227111_at	zinc finger and BTB domain containing 34
227689_at	zinc finger protein 227
206059_at	zinc finger protein 91
238149_at	zinc finger protein 818 pseudogene
231940_at	zinc finger protein 529
232478_at	nuclear receptor subfamily 6, group A, member 1
213698_at, 227595_at	hypothetical LOC100130633; zinc finger, MYM-type 6
222760_at	zinc finger protein 703
220391_at	zinc finger and BTB domain containing 3
218263_s_at	zinc finger, BED-type containing 5
235122_at	human immunodeficiency virus type I enhancer binding protein 3
206175_x_at	zinc finger protein 222
225509_at, 219129_s_at	SAP30-like
241731_x_at	zinc finger protein 440
1553719_s_at	zinc finger protein 548
213402_at	zinc finger protein 787
203604_at	zinc finger protein 516
212696_s_at	ring finger protein 4; hypothetical LOC644006
203247_s_at	zinc finger protein 24
229881_at	Kruppel-like factor 12
208960_s_at	Kruppel-like factor 6
203959_s_at	zinc finger and BTB domain containing 40
1558755_x_at, 1558754_at	zinc finger protein 763
228005_at	zinc finger, X-linked, duplicated B
211721_s_at	zinc finger protein 551
40446_at	PHD finger protein 1
237449_at	Sp8 transcription factor
222891_s_at, 1559078_at	B-cell CLL/lymphoma 11A (zinc finger protein)
230063_at, 205917_at	zinc finger protein 264
205791_x_at	zinc finger protein 230
205312_at	spleen focus forming virus (SFFV) proviral integration oncogene spi1
217627_at	zinc finger protein 573
243312_at	zinc finger protein 107
1553193_at	zinc finger protein 441
1563321_s_at	myeloid/lymphoid or mixed-lineage leukemia (trithorax homolog, Drosophila); translocated to, 10
221213_s_at	zinc finger protein 280D
226754_at	zinc finger protein 251
205383_s_at, 235308_at	zinc finger and BTB domain containing 20
218486_at	Kruppel-like factor 11
228099_at	zinc finger protein 550
205437_at	zinc finger protein 211
213452_at	zinc finger protein 184
218312_s_at, 217593_at	zinc finger and SCAN domain containing 18
229661_at	sal-like 4 (Drosophila)
208012_x_at, 209762_x_at	SP110 nuclear body protein
214686_at	zinc finger protein 266
235810_at	zinc finger protein 182
225800_at, 225798_at	JAZF zinc finger 1
214706_at	zinc finger protein 200
227122_at	zinc finger protein 791
207236_at	zinc finger protein 345
227284_at	zinc finger protein 766
208119_s_at	zinc finger protein 93
207128_s_at	zinc finger protein 223
235648_at	zinc finger protein 567
225050_at	zinc finger protein 512
203026_at	zinc finger and BTB domain containing 5
227294_at	zinc finger protein 689
227603_at, 231836_at	GLI-Kruppel family member HKR1
236395_at, 209199_s_at, 239938_x_at, 209200_at	myocyte enhancer factor 2C
226787_at	zinc finger protein 18
227523_s_at, 222133_s_at, 230098_at	PHD finger protein 20-like 1
226820_at	zinc finger protein 362
229766_at	zinc finger protein 445
221645_s_at	zinc finger protein 83
1556269_at	myelin transcription factor 1
202134_s_at	WW domain containing transcription regulator 1
228460_at	zinc finger protein 319
215570_s_at	zinc finger protein 780B
201483_s_at	suppressor of Ty 4 homolog 1 (S. cerevisiae)
1555789_s_at, 223081_at	PHD finger protein 23
219041_s_at	replication initiator 1
225945_at	zinc finger protein 655
227731_at	CCHC-type zinc finger, nucleic acid binding protein
223393_s_at, 223392_s_at	teashirt zinc finger homeobox 3
222526_at	GATA zinc finger domain containing 2A
224518_s_at	zinc finger protein 559
209750_at	nuclear receptor subfamily 1, group D, member 2
206567_s_at	PHD finger protein 20
206240_s_at	zinc finger protein 136
1556060_a_at	zinc finger protein 451
227796_at	zinc finger protein 62 homolog (mouse)
243024_at	zinc finger protein 394
236811_at	DMRT-like family C2
243255_at	SRY (sex determining region Y)-box 6
223145_s_at, 213810_s_at, 223144_s_at, 223143_s_at	akirin 2
1555325_s_at	zinc finger protein 26
234292_s_at	zinc finger protein 852; zinc finger protein 167
239952_at	zinc finger E-box binding homeobox 1
230408_at	polycomb group ring finger 3
227150_at, 205322_s_at, 205323_s_at	metal-regulatory transcription factor 1
228927_at	zinc finger protein 397
227674_at, 243790_at	zinc finger protein 585A
242864_at	zinc finger protein 554
205931_s_at, 229228_at	cAMP responsive element binding protein 5
219676_at	zinc finger and SCAN domain containing 16
226102_at	zinc finger protein 192
203319_s_at	zinc finger protein 148
230205_at	zinc finger protein 561; zinc finger protein 812
243254_at	human immunodeficiency virus type I enhancer binding protein 2
226344_at	zinc finger, matrin type 1
233169_at	zinc finger protein 350
217986_s_at	bromodomain adjacent to zinc finger domain, 1A
209431_s_at	POZ (BTB) and AT hook containing zinc finger 1
238493_at	zinc finger protein 506
226255_at	zinc finger and BTB domain containing 33
226111_s_at	zinc finger protein 385A
201548_s_at	similar to Jumonji, AT rich interactive domain 1B (RBP2-like); lysine (K)-specific demethylase 5B
218325_s_at	death inducer-obliterator 1
233461_x_at	zinc finger protein 226
238937_at	zinc finger protein 420
225629_s_at	zinc finger and BTB domain containing 4
203278_s_at, 1558965_at, 1554153_a_at, 227090_at	PHD finger protein 21A
227613_at	zinc finger protein 331
216399_s_at	S-phase cyclin A-associated protein in the ER
226646_at	Kruppel-like factor 2 (lung)
235698_at	zinc finger protein 90 homolog (mouse)
225048_at	PHD finger protein 10
228769_at	zinc finger and SCAN domain containing 22
239250_at	zinc finger protein 542
224782_at	zinc finger, matrin type 2
212684_at	zinc finger protein 3
204937_s_at, 232436_at	zinc finger protein 274
218401_s_at	zinc finger protein 281
228346_at	zinc finger protein 844
218059_at	zinc finger protein 706
228393_s_at, 218490_s_at	zinc finger protein 302
1566161_at	Meis homeobox 2
235179_at	zinc finger protein 641
226680_at	IKAROS family zinc finger 5 (Pegasus)
226143_at	retinoic acid induced 1
235170_at	zinc finger protein 92
225053_at	CCR4-NOT transcription complex, subunit 7
226240_at	transcriptional adaptor 2 (ADA2 homolog, yeast)-beta
221844_x_at	zinc finger protein 574
244752_at, 229743_at	zinc finger protein 438
219801_at	zinc finger protein 34
55872_at	zinc finger protein 512B
214760_at	zinc finger protein 337
225005_at	PHD finger protein 13
223714_at	zinc finger protein 256
229000_at	zinc finger protein 77
204523_at	zinc finger protein 140
1553957_at	zinc finger protein 564
200050_at	zinc finger protein 146
Gene Group 29 (Module E)	Enrichment Score: 2.432329113697422
AFFYMETRIX_3PRIME_IVT_ID	Gene Name
228492_at	ubiquitin specific peptidase 9, Y-linked
220370_s_at	ubiquitin specific peptidase 36
235772_at, 227754_at	ubiquitin specific peptidase 54
231990_at	ubiquitin specific peptidase 15
211702_s_at	similar to TBC1 domain family, member 3; ubiquitin specific peptidase 32
223288_at, 223289_s_at	ubiquitin specific peptidase 38
214790_at	SUMO1/sentrin specific peptidase 6
202681_at	ubiquitin specific peptidase 4 (proto-oncogene)
213327_s_at	ubiquitin specific peptidase 12
209103_s_at	ubiquitin fusion degradation 1 like (yeast)
Gene Group 30 (Module C)	Enrichment Score: 2.404894833873376
AFFYMETRIX_3PRIME_IVT_ID	Gene Name
238020_at	proteasome (prosome, macropain) 26S subunit, ATPase, 2
230037_at	anaphase promoting complex subunit 1; similar to anaphase promoting complex subunit 1
209658_at	cell division cycle 16 homolog (S. cerevisiae)
214590_s_at	ubiquitin-conjugating enzyme E2D 1 (UBC4/5 homolog, yeast)
201233_at	proteasome (prosome, macropain) 26S subunit, non-ATPase, 13
200719_at, 200718_s_at	S-phase kinase-associated protein 1
235926_at	anaphase promoting complex subunit 5
243286_at	cullin 1
209853_s_at, 200987_x_at	proteasome (prosome, macropain) activator subunit 3 (PA28 gamma; Ki)
201458_s_at, 229827_at	budding uninhibited by benzimidazoles 3 homolog (yeast)
Gene Group 31 (Module D)	Enrichment Score: 2.3373215190980985
AFFYMETRIX_3PRIME_IVT_ID	Gene Name
207065_at	keratin 75
1558394_s_at	keratin 7
212730_at	synemin, intermediate filament protein
213287_s_at	keratin 10
1558672_at	internexin neuronal intermediate filament protein, alpha
Gene Group 32 (Module E)	Enrichment Score: 2.185792768519362
AFFYMETRIX_3PRIME_IVT_ID	Gene Name
230597_at	solute carrier family 7 (cationic amino acid transporter, y+ system), member 3
209921_at	solute carrier family 7, (cationic amino acid transporter, y+ system) member 11
237318_at	solute carrier family 43, member 2
222982_x_at, 218041_x_at, 220924_s_at	solute carrier family 38, member 2
203579_s_at	solute carrier family 7 (cationic amino acid transporter, y+ system), member 6
204394_at	solute carrier family 43, member 1
220786_s_at	solute carrier family 38, member 4
Gene Group 33 (Module D)	Enrichment Score: 1.9853609991642505
AFFYMETRIX_3PRIME_IVT_ID	Gene Name
220577_at	GTPase, very large interferon inducible 1
219243_at	GTPase, IMAP family member 4
209882_at, 239843_at	Ras-like without CAAX 1
233664_at	ADP-ribosylation factor-like 15
232953_at	chromosome 20 open reading frame 69; similar to hCG1984118
238431_at	ADP-ribosylation factor-like 5A
219151_s_at	RAB, member of RAS oncogene family-like 2B
219777_at, 229367_s_at	GTPase, IMAP family member 6
223428_s_at, 223429_x_at, 225632_s_at, 223831_x_at	RAB43, member RAS oncogene family; hypothetical LOC100131426
234311_s_at	GTP-binding protein 10 (putative)
219622_at	RAB20, member RAS oncogene family
221524_s_at	Ras-related GTP binding D
Gene Group 34 (Module C)	Enrichment Score: 1.8448387484356907
AFFYMETRIX_3PRIME_IVT_ID	Gene Name
201542_at	SAR1 homolog A (S. cerevisiae)
203175_at	ras homolog gene family, member G (rho G)
218668_s_at, 218669_at	RAP2C, member of RAS oncogene family
222981_s_at	RAB10, member RAS oncogene family
213923_at	RAP2B, member of RAS oncogene family
201526_at	ADP-ribosylation factor 5
228113_at, 244124_at	RAB37, member RAS oncogene family
225251_at, 1555311_at	RAB24, member RAS oncogene family
202101_s_at, 202100_at	v-ral simian leukemia viral oncogene homolog B (ras related; GTP binding protein)
208819_at	RAB8A, member RAS oncogene family
222846_at, 219210_s_at	RAB8B, member RAS oncogene family
1554482_a_at	SAR1 homolog B (S. cerevisiae)
200833_s_at	RAP1B, member of RAS oncogene family
208734_x_at	RAB2A, member RAS oncogene family
206113_s_at	RAB5A, member RAS oncogene family
224377_s_at	RAB18, member RAS oncogene family
219151_s_at	RAB, member of RAS oncogene family-like 2B
203885_at	RAB21, member RAS oncogene family
208466_at	RAB3D, member RAS oncogene family
207791_s_at, 208724_s_at	RAB1A, member RAS oncogene family
217763_s_at, 217764_s_at, 217762_s_at	RAB31, member RAS oncogene family
223428_s_at, 223429_x_at, 225632_s_at, 223831_x_at	RAB43, member RAS oncogene family; hypothetical LOC100131426
219622_at	RAB20, member RAS oncogene family
209882_at, 239843_at	Ras-like without CAAX 1
238431_at	ADP-ribosylation factor-like 5A
211961_s_at	RAB7A, member RAS oncogene family
Gene Group 35 (Module E)	Enrichment Score: 1.6347455803136703
AFFYMETRIX_3PRIME_IVT_ID	Gene Name
213313_at	RAB GTPase activating protein 1
226409_at	TBC1 domain family, member 20
1569566_at, 1568713_a_at	TBC1 (tre-2/USP6, BUB2, cdc16) domain family, member 1
228258_at	TBC1 domain family, member 10C
1562239_at	small G protein signaling modulator 1
224622_at	TBC1 domain family, member 14
209403_at	TBC1 domain family, member 3E; TBC1 domain family, member 3F; TBC1 domain family, member 3G; TBC1 domain family member 3C-like protein ENSP00000341742; TBC1 domain family, member 3H; TBC1 domain family, member 3; TBC1 domain family, member 3I; TBC1 domain family, member 3B; TBC1 domain family, member 3C
229377_at	growth hormone regulated TBC protein 1
217538_at, 36129_at	small G protein signaling modulator 2
33778_at	TBC1 domain family, member 22A
232702_at	RAB GTPase activating protein 1-like
1556054_at	TBC1 domain family, member 8 (with GRAM domain)
203387_s_at	TBC1 domain family, member 4
Gene Group 36 (Module E)	Enrichment Score: 1.5639840584861835
AFFYMETRIX_3PRIME_IVT_ID	Gene Name
236107_at	ubiquitin-conjugating enzyme E2Z
214590_s_at	ubiquitin-conjugating enzyme E2D 1 (UBC4/5 homolog, yeast)
1557053_s_at, 209042_s_at	ubiquitin-conjugating enzyme E2G 2 (UBC7 homolog, yeast)
225651_at	ubiquitin-conjugating enzyme E2E 2 (UBC4/5 homolog, yeast)
201899_s_at	ubiquitin-conjugating enzyme E2A (RAD6 homolog)
229355_at	ubiquitin-conjugating enzyme E2D 3 (UBC4/5 homolog, yeast); ubiquitin-conjugating enzyme E2D 3 pseudogene
231948_s_at	ubiquitin-conjugating enzyme E2F (putative)
209142_s_at, 209141_at	ubiquitin-conjugating enzyme E2G 1 (UBC7 homolog, yeast)
222657_s_at	ubiquitin-conjugating enzyme E2W (putative)
Gene Group 37 (Module D)	Enrichment Score: 1.3632127532432796
AFFYMETRIX_3PRIME_IVT_ID	Gene Name
235549_at, 239012_at	ring finger protein 144B
228753_at	Cas-Br-M (murine) ecotropic retroviral transforming sequence-like 1
236972_at	tripartite motif-containing 63
223612_s_at	ligand of numb-protein X 1
201881_s_at	ariadne homolog, ubiquitin-conjugating enzyme E2 binding protein, 1 (Drosophila)
201230_s_at, 238068_at, 227932_at	ariadne homolog 2 (Drosophila)
Gene Group 38 (Module D)	Enrichment Score: 1.1733213106161982
AFFYMETRIX_3PRIME_IVT_ID	Gene Name
226878_at	major histocompatibility complex, class II, DO alpha
218831_s_at	Fc fragment of IgG, receptor, transporter, alpha
212671_s_at, 213831_at	similar to hCG2042724; similar to HLA class II histocompatibility antigen, DQ(1) alpha chain precursor (DC-4 alpha chain); major histocompatibility complex, class II, DQ alpha 1
201137_s_at	major histocompatibility complex, class II, DP beta 1
205987_at	CD1c molecule
221978_at	major histocompatibility complex, class I, F
209728_at, 208306_x_at, 204670_x_at, 209312_x_at	major histocompatibility complex, class II, DR beta 4; major histocompatibility complex, class II, DR beta 1
221491_x_at, 215193_x_at	major histocompatibility complex, class II, DR beta 3
208894_at	major histocompatibility complex, class II, DR alpha
211654_x_at, 209480_at, 209823_x_at, 212998_x_at, 212999_x_at, 211656_x_at	major histocompatibility complex, class II, DQ beta 1; similar to major histocompatibility complex, class II, DQ beta 1
203932_at	major histocompatibility complex, class II, DM beta
211990_at, 213537_at, 211991_s_at	major histocompatibility complex, class II, DP alpha 1
Gene Group 39 (Module C)	Enrichment Score: 1.1161911996931295
AFFYMETRIX_3PRIME_IVT_ID	Gene Name
203613_s_at	NADH dehydrogenase (ubiquinone) 1 beta subcomplex, 6, 17kDa
204125_at	NADH dehydrogenase (ubiquinone) 1 alpha subcomplex, assembly factor 1
209066_x_at	similar to ubiquinol-cytochrome c reductase binding protein; ubiquinol-cytochrome c reductase binding protein pseudogene; ubiquinol-cytochrome c reductase binding protein
202000_at	NADH dehydrogenase (ubiquinone) 1 alpha subcomplex, 6, 14kDa
203371_s_at	NADH dehydrogenase (ubiquinone) 1 beta subcomplex, 3, 12kDa
200883_at, 212600_s_at	ubiquinol-cytochrome c reductase core protein II
223244_s_at	NADH dehydrogenase (ubiquinone) 1 alpha subcomplex, 12
Gene Group 40 (Module E)	Enrichment Score: 0.9820068555818113
AFFYMETRIX_3PRIME_IVT_ID	Gene Name
1559096_x_at	F-box protein 9
218050_at, 242669_at	ubiquitin-fold modifier 1
218539_at	F-box protein 34
209005_at, 209004_s_at	F-box and leucine-rich repeat protein 5
227203_at	F-box and leucine-rich repeat protein 17
227568_at	HECT domain containing 2
220127_s_at	F-box and leucine-rich repeat protein 12
212231_at	F-box protein 21
214790_at	SUMO1/sentrin specific peptidase 6
227641_at	F-box and leucine-rich repeat protein 16
219641_at	de-etiolated homolog 1 (Arabidopsis)
202038_at	ubiquitination factor E4A (UFD2 homolog, yeast)
209103_s_at	ubiquitin fusion degradation 1 like (yeast)
Gene Group 41 (Module D)	Enrichment Score: 0.9603517068385458
AFFYMETRIX_3PRIME_IVT_ID	Gene Name
235549_at, 239012_at	ring finger protein 144B
230112_at	membrane-associated ring finger (C3HC4) 4
210075_at	membrane-associated ring finger (C3HC4) 2
213256_at	membrane-associated ring finger (C3HC4) 3
218582_at	membrane-associated ring finger (C3HC4) 5
Gene Group 42 (Module C)	Enrichment Score: 0.6832233874126618
AFFYMETRIX_3PRIME_IVT_ID	Gene Name
237338_at	UDP-GlcNAc:betaGal beta-1,3-N-acetylglucosaminyltransferase 8
230482_at	ST6 (alpha-N-acetyl-neuraminyl-2,3-beta-galactosyl-1,3)-N-acetylgalactosaminide alpha-2,6-sialyltransferase 5
203217_s_at	ST3 beta-galactoside alpha-2,3-sialyltransferase 5
222870_s_at, 219326_s_at, 224154_at	UDP-GlcNAc:betaGal beta-1,3-N-acetylglucosaminyltransferase 1; UDP-GlcNAc:betaGal beta-1,3-N-acetylglucosaminyltransferase 2
203759_at	ST3 beta-galactoside alpha-2,3-sialyltransferase 4
210506_at	fucosyltransferase 7 (alpha (1,3) fucosyltransferase)
242511_at, 1555702_a_at	ST3 beta-galactoside alpha-2,3-sialyltransferase 3
217650_x_at, 229336_at	ST3 beta-galactoside alpha-2,3-sialyltransferase 2
Gene Group 43 (Module C)	Enrichment Score: 0.6346376020721692
AFFYMETRIX_3PRIME_IVT_ID	Gene Name
32091_at, 212683_at	solute carrier family 25, member 44
205716_at	solute carrier family 25, member 40
208998_at, 208997_s_at	uncoupling protein 2 (mitochondrial, proton carrier)
235747_at	solute carrier family 25 (mitochondrial carrier; Graves disease autoantigen), member 16
221619_s_at	mitochondrial carrier homolog 1 (C. elegans)
226928_x_at, 231274_s_at	solute carrier family 25, member 37
219156_at, 227274_at	synaptojanin 2 binding protein
201918_at, 201917_s_at, 201919_at	solute carrier family 25, member 36
1563498_s_at, 236436_at	solute carrier family 25, member 45
218271_s_at	presenilin associated, rhomboid-like
212862_at, 212864_at	CDP-diacylglycerol synthase (phosphatidate cytidylyltransferase) 2
242361_at	inner membrane protein, mitochondrial (mitofilin)
Gene Group 44 (Module D)	Enrichment Score: 0.628183567592896
AFFYMETRIX_3PRIME_IVT_ID	Gene Name
206153_at	cytochrome P450, family 4, subfamily F, polypeptide 11
226402_at	cytochrome P450, family 2, subfamily U, polypeptide 1
210452_x_at	cytochrome P450, family 4, subfamily F, polypeptide 2
203475_at	cytochrome P450, family 19, subfamily A, polypeptide 1
206514_s_at	cytochrome P450, family 4, subfamily F, polypeptide 3
202437_s_at, 202435_s_at, 202436_s_at	cytochrome P450, family 1, subfamily B, polypeptide 1
206539_s_at	similar to cytochrome P450, family 4, subfamily F, polypeptide 12; cytochrome P450, family 4, subfamily F, polypeptide 12
228391_at	cytochrome P450, family 4, subfamily V, polypeptide 2
Gene Group 45 (Module C)	Enrichment Score: 0.5410061874904887
AFFYMETRIX_3PRIME_IVT_ID	Gene Name
238523_at, 227319_at	kelch-like 36 (Drosophila)
204423_at	muskelin 1, intracellular mediator containing kelch motifs
219157_at	kelch-like 2, Mayven (Drosophila)
226874_at, 242648_at	kelch-like 8 (Drosophila)
217906_at	kelch domain containing 2
243305_at	kelch domain containing 5
1552733_at	kelch domain containing 1
221985_at	kelch-like 24 (Drosophila)
223585_x_at	kelch repeat and BTB (POZ) domain containing 2
204177_s_at	kelch-like 20 (Drosophila)
Gene Group 46 (Module D)	Enrichment Score: 0.501636202894935
AFFYMETRIX_3PRIME_IVT_ID	Gene Name
230637_at	sideroflexin 4
240277_at	solute carrier family 30 (zinc transporter), member 7
202614_at	solute carrier family 30 (zinc transporter), member 9
226444_at	solute carrier family 39 (zinc transporter), member 10
1559993_at	sideroflexin 3
219869_s_at	solute carrier family 39 (zinc transporter), member 8
Gene Group 47 (Module A)	Enrichment Score: 0.31834100814693705
AFFYMETRIX_3PRIME_IVT_ID	Gene Name
200096_s_at, 214150_x_at, 201172_x_at, 236527_at, 201171_at	ATPase, H+ transporting, lysosomal 9kDa, V0 subunit e1
212041_at	ATPase, H+ transporting, lysosomal 38kDa, V0 subunit d1
205781_at	chromosome 16 open reading frame 7
202872_at, 202874_s_at	ATPase, H+ transporting, lysosomal 42kDa, V1 subunit C1
212754_s_at	MON2 homolog (S. cerevisiae)
208745_at	ATP synthase, H+ transporting, mitochondrial F0 complex, subunit G
Gene Group 48 (Module E)	Enrichment Score: 0.0801859611658562
AFFYMETRIX_3PRIME_IVT_ID	Gene Name
224846_at	SH3KBP1 binding protein 1
223176_at, 228299_at	potassium channel tetramerisation domain containing 20
213474_at	potassium channel tetramerisation domain containing 7
206842_at	potassium voltage-gated channel, Shal-related subfamily, member 1
229873_at	potassium channel tetramerisation domain containing 21
Gene Group 49 (Module C)	Enrichment Score: 0.05654650826431266
AFFYMETRIX_3PRIME_IVT_ID	Gene Name
243209_at	potassium voltage-gated channel, KQT-like subfamily, member 4
242108_at	two pore segment channel 1
235194_at	two pore segment channel 2
236407_at	potassium voltage-gated channel, Isk-related family, member 1
206842_at	potassium voltage-gated channel, Shal-related subfamily, member 1
210119_at, 211806_s_at	potassium inwardly-rectifying channel, subfamily J, member 15
224099_at	potassium voltage-gated channel, subfamily H (eag-related), member 7
Gene Group 50 (Module C)	Enrichment Score: 0.03200999770010787
AFFYMETRIX_3PRIME_IVT_ID	Gene Name
217209_at	carcinoembryonic antigen-related cell adhesion molecule 3
209770_at	butyrophilin, subfamily 3, member A1
211287_x_at, 207085_x_at, 210340_s_at	colony stimulating factor 2 receptor, alpha, low-affinity (granulocyte-macrophage)
208594_x_at	leukocyte immunoglobulin-like receptor, subfamily A (with TM domain), member 6
240396_at	interleukin 20 receptor, alpha
1567624_at	triggering receptor expressed on myeloid cells-like 2 pseudogene; triggering receptor expressed on myeloid cells-like 2
204773_at	interleukin 11 receptor, alpha
230631_s_at, 230632_at	interferon (alpha, beta and omega) receptor 2
216950_s_at	Fc fragment of IgG, high affinity Ic, receptor (CD64); Fc fragment of IgG, high affinity Ia, receptor (CD64)
205403_at, 211372_s_at	interleukin 1 receptor, type II
221112_at	interleukin 1 receptor accessory protein-like 2
220000_at	sialic acid binding Ig-like lectin 5
227154_at	immunoglobin superfamily, member 21
1552584_at	interleukin 12 receptor, beta 1
206215_at	opioid binding protein/cell adhesion molecule-like
201642_at	interferon gamma receptor 2 (interferon gamma transducer 1)
204912_at	interleukin 10 receptor, alpha
218831_s_at	Fc fragment of IgG, receptor, transporter, alpha
210195_s_at	pregnancy specific beta-1-glycoprotein 1
204820_s_at	butyrophilin, subfamily 3, member A3
205707_at	interleukin 17 receptor A
205987_at	CD1c molecule
225669_at	interferon (alpha, beta and omega) receptor 1
225372_at	chromosome 10 open reading frame 54
210660_at	leukocyte immunoglobulin-like receptor, subfamily A (with TM domain), member 1
215492_x_at	pre T-cell antigen receptor alpha
202948_at	interleukin 1 receptor, type I
215838_at, 1555643_s_at	leukocyte immunoglobulin-like receptor, subfamily A (with TM domain), member 5
232891_at	signal-regulatory protein delta
221601_s_at	Fas apoptotic inhibitory molecule 3
207072_at	interleukin 18 receptor accessory protein
227458_at, 223834_at	CD274 molecule
205298_s_at	butyrophilin, subfamily 2, member A2
206618_at	interleukin 18 receptor 1
210569_s_at	sialic acid binding Ig-like lectin 9
207674_at, 211306_s_at, 211307_s_at, 211816_x_at	Fc fragment of IgA, receptor for
209575_at	interleukin 10 receptor, beta
204006_s_at	Fc fragment of IgG, low affinity IIIa, receptor (CD16a)
206120_at	CD33 molecule
217095_x_at	natural cytotoxicity triggering receptor 1
234632_x_at, 234640_x_at, 220421_at	butyrophilin-like 8
205988_at, 244352_at, 211192_s_at	CD84 molecule
217024_x_at, 202897_at, 1558299_at, 202896_s_at	signal-regulatory protein alpha
211100_x_at, 211102_s_at, 207857_at, 211101_x_at	leukocyte immunoglobulin-like receptor, subfamily A (with TM domain), member 2
Gene Group 51 (Module D)	Enrichment Score: 0.031214074129214738
AFFYMETRIX_3PRIME_IVT_ID	Gene Name
216355_at	protocadherin beta 17 pseudogene
204751_x_at	desmocollin 2
232054_at	protocadherin 20
227282_at	protocadherin 19
232631_at	cadherin 6, type 2, K-cadherin (fetal kidney)
Gene Group 52 (Module A)	Enrichment Score: 0.023433825332313224
AFFYMETRIX_3PRIME_IVT_ID	Gene Name
1560262_at	leucine rich repeat containing 32
223552_at	leucine rich repeat containing 4
218684_at	leucine rich repeat containing 8 family, member D
229231_at	similar to hCG1991475; leucine rich repeat containing 37B
207926_at	glycoprotein V (platelet)
223750_s_at	toll-like receptor 10
210166_at	toll-like receptor 5
Gene Group 53 (Module C)	Enrichment Score: 6.490881556256639E-4
AFFYMETRIX_3PRIME_IVT_ID	Gene Name
226403_at	transmembrane channel-like 4
222979_s_at	surfeit 4
227300_at	transmembrane protein 119
220240_s_at, 220241_at, 226050_at	transmembrane and coiled-coil domains 3
241010_x_at	similar to EGFR-coamplified and overexpressed protein; EGFR-coamplified and overexpressed protein
218802_at	coiled-coil domain containing 109B
240396_at	interleukin 20 receptor, alpha
224807_at	GRAM domain containing 1A
229231_at	similar to hCG1991475; leucine rich repeat containing 37B
208594_x_at	leukocyte immunoglobulin-like receptor, subfamily A (with TM domain), member 6
227236_at	tetraspanin 2
224820_at	family with sequence similarity 36, member A
206470_at, 213241_at, 206471_s_at	plexin C1
219029_at, 1557828_a_at, 238635_at	chromosome 5 open reading frame 28
241115_at	KIAA1467
204773_at	interleukin 11 receptor, alpha
218888_s_at, 222774_s_at	neuropilin (NRP) and tolloid (TLL)-like 2
232053_x_at, 222995_s_at	rhomboid domain containing 2
219872_at	chromosome 4 open reading frame 18
235568_at	chromosome 19 open reading frame 59
1557521_a_at, 201032_at	bladder cancer associated protein
1555338_s_at	aquaporin 10
55662_at	chromosome 10 open reading frame 76
1552971_at	sarcoglycan zeta
225058_at	G protein-coupled receptor 108
227052_at	chromosome 4 open reading frame 34
223482_at	transmembrane protein 120A
214733_s_at	Yip1 domain family, member 1
225463_x_at	G protein-coupled receptor 89C; G protein-coupled receptor 89B; G protein-coupled receptor 89A
226226_at, 230323_s_at	transmembrane protein 45B
223660_at	adenosine A3 receptor
1553723_at, 220404_at	G protein-coupled receptor 97
218109_s_at	major facilitator superfamily domain containing 1
202668_at	ephrin-B2
234725_s_at	sema domain, immunoglobulin domain (Ig), transmembrane domain (TM) and short cytoplasmic domain, (semaphorin) 4B
207674_at, 211306_s_at, 211307_s_at, 211816_x_at	Fc fragment of IgA, receptor for
201601_x_at, 214022_s_at	interferon induced transmembrane protein 1 (9-27)
212475_at	AVL9 homolog (S. cerevisiase)
225281_at	chromosome 3 open reading frame 17
204912_at	interleukin 10 receptor, alpha
212203_x_at	interferon induced transmembrane protein 3 (1-8U)
221452_s_at	transmembrane protein 14D; transmembrane protein 14B
218753_at	XK, Kell blood group complex subunit-related family, member 8
219253_at	transmembrane protein 185B (pseudogene)
241392_at	transmembrane protein 39A
206656_s_at, 227857_at, 228309_at	chromosome 20 open reading frame 3
223105_s_at	transmembrane protein 14C
225579_at	PQ loop repeat containing 3
1569852_at, 239203_at	chromosome 7 open reading frame 53
239593_at	transmembrane protein 213
219223_at	chromosome 9 open reading frame 7
233141_s_at	suppression of tumorigenicity 7 like
1560724_at, 240310_at, 212409_s_at	torsin A interacting protein 1
227861_at	transmembrane protein 161B
225372_at	chromosome 10 open reading frame 54
1556209_at	C-type lectin domain family 2, member B
238792_at, 213159_at, 235082_at, 229287_at, 239100_x_at, 213173_at, 215175_at	pecanex homolog (Drosophila)
220558_x_at, 233467_s_at	tetraspanin 32
209551_at	Yip1 domain family, member 4
221516_s_at	Smith-Magenis syndrome chromosome region, candidate 7-like
228819_at	tetraspanin 18
228981_at	transmembrane protein 169
56256_at	SID1 transmembrane family, member 2
212158_at	syndecan 2
222934_s_at, 219859_at	C-type lectin domain family 4, member E
205668_at, 203799_at	CD302 molecule; lymphocyte antigen 75
229390_at, 229391_s_at	family with sequence similarity 26, member F
1552386_at	GRB2-binding adaptor protein, transmembrane
218531_at	transmembrane protein 134
1552302_at	hypothetical LOC728772; transmembrane protein 106A
220945_x_at	MANSC domain containing 1
1569335_a_at	stimulated by retinoic acid gene 6 homolog (mouse)
1559132_at	transmembrane protein 80
212090_at	glutamate receptor, ionotropic, N-methyl D-aspartate-associated protein 1 (glutamate binding)
209446_s_at	chromosome 7 open reading frame 44
225711_at, 225707_at	ADP-ribosylation-like factor 6 interacting protein 6
1555651_at	olfactory receptor, family 10, subfamily A, member 5
228437_at, 218728_s_at, 228306_at, 223993_s_at, 243051_at	cornichon homolog 4 (Drosophila)
204122_at	TYRO protein tyrosine kinase binding protein
225698_at	chromosome 5 open reading frame 26
231008_at	unc-5 homolog C (C. elegans)-like
226244_at	C-type lectin domain family 14, member A
232513_x_at	chromosome 20 open reading frame 107
242424_at	LETM1 domain containing 1
229810_at	klotho beta
235548_at	adenomatosis polyposis coli down-regulated 1-like
213609_s_at	seizure related 6 homolog (mouse)-like
219329_s_at	chromosome 2 open reading frame 28
222752_s_at	transmembrane protein 206
219761_at	C-type lectin domain family 1, member A
1567624_at	triggering receptor expressed on myeloid cells-like 2 pseudogene; triggering receptor expressed on myeloid cells-like 2
201631_s_at	immediate early response 3
230161_at	CD99 molecule
219892_at	transmembrane 6 superfamily member 1
224708_at, 224706_at	KIAA2013; hypothetical LOC728138
1569003_at	transmembrane protein 49
220495_s_at	thioredoxin domain containing 15
225794_s_at	chromosome 22 open reading frame 32
217209_at	carcinoembryonic antigen-related cell adhesion molecule 3
205988_at, 244352_at, 211192_s_at	CD84 molecule
1568718_at	solute carrier family 22, member 23
210006_at	abhydrolase domain containing 14A
1555736_a_at, 225059_at, 238135_at	angiotensin II receptor-associated protein
212343_at	Yip1 domain family, member 6
244780_at	sphingosine-1-phosphate phosphotase 2
207996_s_at	chromosome 18 open reading frame 1
218146_at	glycosyltransferase 8 domain containing 1
235245_at	transmembrane protein 92
209329_x_at	HIG1 hypoxia inducible domain family, member 2A
236172_at, 210128_s_at	leukotriene B4 receptor
225599_s_at, 1562066_at, 225600_at	chromosome 8 open reading frame 83
224676_at	transmembrane emp24 protein transport domain containing 4
222787_s_at, 226529_at	transmembrane protein 106B
223458_at	seizure related 6 homolog (mouse)-like 2
209263_x_at	tetraspanin 4
220998_s_at	unc-93 homolog B1 (C. elegans); unc-93 homolog B6 (C. elegans); unc-93 homolog B3 pseudogene (C. elegans); similar to unc-93 homolog B1 (C. elegans)
238429_at	transmembrane protein 71
214104_at	G protein-coupled receptor 161
232267_at	G protein-coupled receptor 133
220178_at	chromosome 19 open reading frame 28
204897_at	prostaglandin E receptor 4 (subtype EP4)
205707_at	interleukin 17 receptor A
223304_at	solute carrier family 37 (glycerol-3-phosphate transporter), member 3
202699_s_at	transmembrane protein 63A
235907_at, 218465_at, 222642_s_at	transmembrane protein 33
216084_at	hypothetical protein LOC259308; chromosome 9 open reading frame 144
214749_s_at	similar to armadillo repeat containing, X-linked 6; armadillo repeat containing, X-linked 6
219607_s_at, 224357_s_at, 1555728_a_at	membrane-spanning 4-domains, subfamily A, member 4
235197_s_at	osteopetrosis associated transmembrane protein 1
204215_at	chromosome 7 open reading frame 23
222893_s_at, 219504_s_at	RNA polymerase II associated protein 2
219283_at	C1GALT1-specific chaperone 1
217845_x_at, 221896_s_at	similar to HIG1 domain family, member 1A; HIG1 hypoxia inducible domain family, member 1A; HIG1 hypoxia inducible domain family, member 1D
205684_s_at	DENN/MADD domain containing 4C
232591_s_at	transmembrane protein 30A
215492_x_at	pre T-cell antigen receptor alpha
227769_at	G protein-coupled receptor 27
241176_at	KIAA0408; chromosome 6 open reading frame 174
226805_at	fat storage-inducing transmembrane protein 2
201315_x_at	interferon induced transmembrane protein 2 (1-8D)
202771_at	family with sequence similarity 38, member A
200620_at	transmembrane protein 59
203437_at	transmembrane protein 11
203904_x_at	CD82 molecule
224755_at	transmembrane 9 superfamily member 3
230360_at	gliomedin
227856_at	chromosome 4 open reading frame 32
224290_at	vomeronasal 1 receptor 3 pseudogene
226142_at, 214085_x_at	GLI pathogenesis-related 1
225462_at	transmembrane protein 128
1560878_at	synaptotagmin XV
206682_at	C-type lectin domain family 10, member A
203416_at	CD53 molecule
220513_at	KH homology domain containing 1; hypothetical protein LOC100129128
210542_s_at, 219229_at, 229776_at, 227367_at	solute carrier organic anion transporter family, member 3A1
215838_at, 1555643_s_at	leukocyte immunoglobulin-like receptor, subfamily A (with TM domain), member 5
221756_at	phosphoinositide-3-kinase interacting protein 1
1552501_a_at	G protein-coupled bile acid receptor 1
226818_at, 226841_at	macrophage expressed 1
212314_at	KIAA0746 protein
229957_at	transmembrane protein 91
1553319_at	oxoglutarate (alpha-ketoglutarate) receptor 1
224698_at	family with sequence similarity 62 (C2 domain containing), member B
222156_x_at	cell cycle progression 1
Gene Group 54 (Module B)	Enrichment Score: 8.59382995584425E-9
AFFYMETRIX_3PRIME_IVT_ID	Gene Name
219652_s_at	chromosome X open reading frame 36
226067_at	chromosome 20 open reading frame 114
218454_at	phospholipase B domain containing 1
228087_at	coiled-coil domain containing 126
230445_at	BTB (POZ) domain containing 17
227968_at	Parkinson disease 7 domain containing 1
242945_at, 226804_at	family with sequence similarity 20, member A
218584_at	tectonic family member 1
239028_at	LY6/PLAUR domain containing 6
226747_at	thioredoxin domain containing 16
243011_at	family with sequence similarity 55, member C
236953_s_at	NHL repeat containing 3
